# Supplementary material for: A Randomized, Double-Blind, Placebo-Controlled Trial to Evaluate the Effects of Multi-Strain Synbiotic in Patients with Functional Diarrhea and High Fecal Calprotectin Levels: A Pilot Study
Source: MDPI journal article supplement (doi:10.3390/nu14235017), 2022-11-25
Supplement: s1 [file s1]

**Supplementary Table S1. Requirements for Trial Subjects**

| <b>Inclusion criteria: All of the following must be satisfied</b> |                                                                                                                                                                                                                                                                                                                                                                                                                                                                                 |
|-------------------------------------------------------------------|---------------------------------------------------------------------------------------------------------------------------------------------------------------------------------------------------------------------------------------------------------------------------------------------------------------------------------------------------------------------------------------------------------------------------------------------------------------------------------|
| 1)                                                                | Consent to participate in this study and sign a written informed consent                                                                                                                                                                                                                                                                                                                                                                                                        |
| 2)                                                                | Adults between the ages of 20 and 65 years                                                                                                                                                                                                                                                                                                                                                                                                                                      |
| 3)                                                                | Have difficult bowel movements (according to Rome IV criteria for functional diarrhea)                                                                                                                                                                                                                                                                                                                                                                                          |
| 4)                                                                | Positive fecal calprotectin test result ( $\geq 11.5$ mg/kg)                                                                                                                                                                                                                                                                                                                                                                                                                    |
| <b>Exclusion criteria: Any of these</b>                           |                                                                                                                                                                                                                                                                                                                                                                                                                                                                                 |
| 1)                                                                | Taking probiotics/prebiotics or antibiotics/anti-inflammatory drugs for more than a week within one month of the first visit                                                                                                                                                                                                                                                                                                                                                    |
| 2)                                                                | Consuming a lot of dietary fiber (recommended food score $> 36$ )                                                                                                                                                                                                                                                                                                                                                                                                               |
| 3)                                                                | Currently have an organic disease of the gastrointestinal system, or within the past 2 years (e.g., Crohn's disease, celiac disease, ulcerative colitis, or pancreatitis)                                                                                                                                                                                                                                                                                                       |
| 4)                                                                | Previous gastrointestinal surgery (gastrectomy, small intestine resection, colectomy, or cholecystectomy) except for appendicitis                                                                                                                                                                                                                                                                                                                                               |
| 5)                                                                | Lactose-intolerant                                                                                                                                                                                                                                                                                                                                                                                                                                                              |
| 6)                                                                | Any of the following or taking related drugs <ul style="list-style-type: none"> <li>A. Severe hepatic or renal dysfunction, cardiovascular disease (including uncontrolled hypertension), immune disorder (immunocompromised patients, immunosuppressant users), malignancy</li> <li>B. Red flags signs such as hemorrhagic hemorrhoids, anal fissures, severe weight loss, and dysphagia</li> <li>C. Alcohol addiction, psychogenic disorders, anorexia, or bulimia</li> </ul> |
| 7)                                                                | Taking the following drugs within 3 days of the first visit <ul style="list-style-type: none"> <li>A. Antispasmodics: Cimetropium, Mebeverine, Pinaverium, Trimebutine, etc.</li> <li>B. Prokinetics: Motilium, Levopride, Itopride, Mosapride, etc.</li> <li>C. Antidepressant: tricyclic antidepressant, selective serotonin reuptake inhibitor</li> <li>D. Antidiarrheal: Loperamide</li> </ul>                                                                              |
| 8)                                                                | Recently traveled to an area with an epidemic parasitic disease                                                                                                                                                                                                                                                                                                                                                                                                                 |
| 9)                                                                | Hypersensitivity to the test food or ingredients contained in the test food                                                                                                                                                                                                                                                                                                                                                                                                     |
| 10)                                                               | Participated in another clinical study within one month of the first visit                                                                                                                                                                                                                                                                                                                                                                                                      |
| 11)                                                               | Pregnant or lactating women, or planning to become pregnant                                                                                                                                                                                                                                                                                                                                                                                                                     |
| 12)                                                               | Judged as inappropriate to participate in the research by the researcher                                                                                                                                                                                                                                                                                                                                                                                                        |
